# Supplementary figures and images for: A new recyclable 1,4-bis(3-methylimidazolium-1-yl)butane ditribromide [bMImB]·(Br3)2ionic liquid reagent for selective bromination of anilines or phenols and α-bromination of alkanones under mild conditions
Source: Royal Society of Chemistry journal article supplement (doi:10.1039/c4ra03006k), 2014-01-01

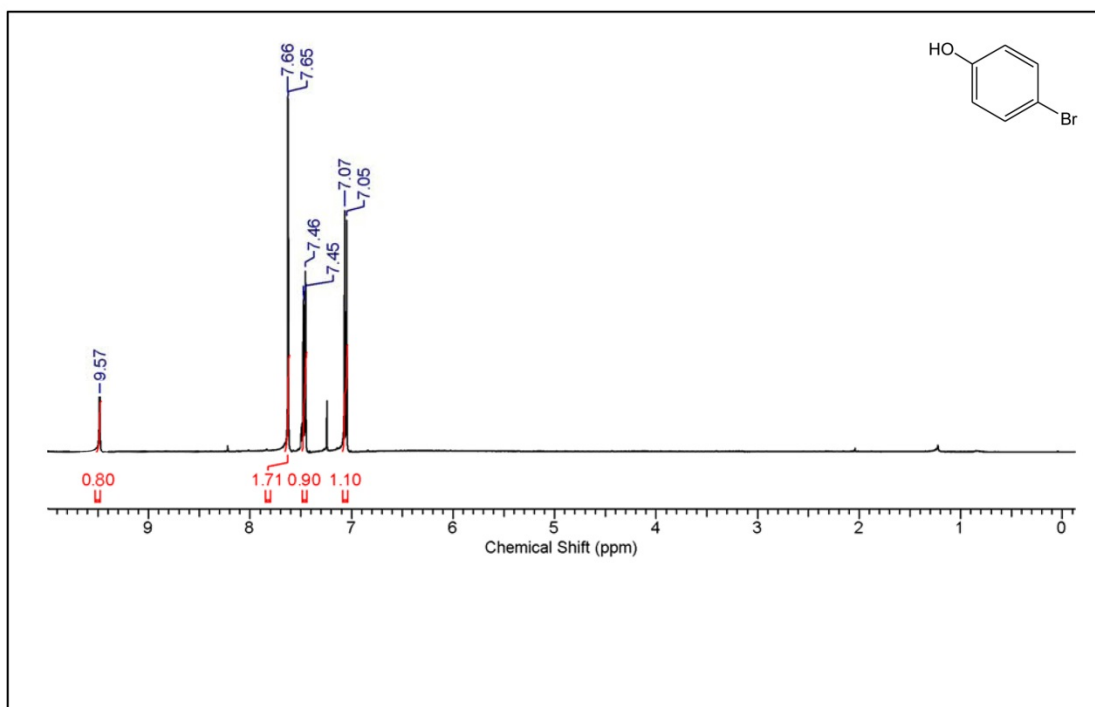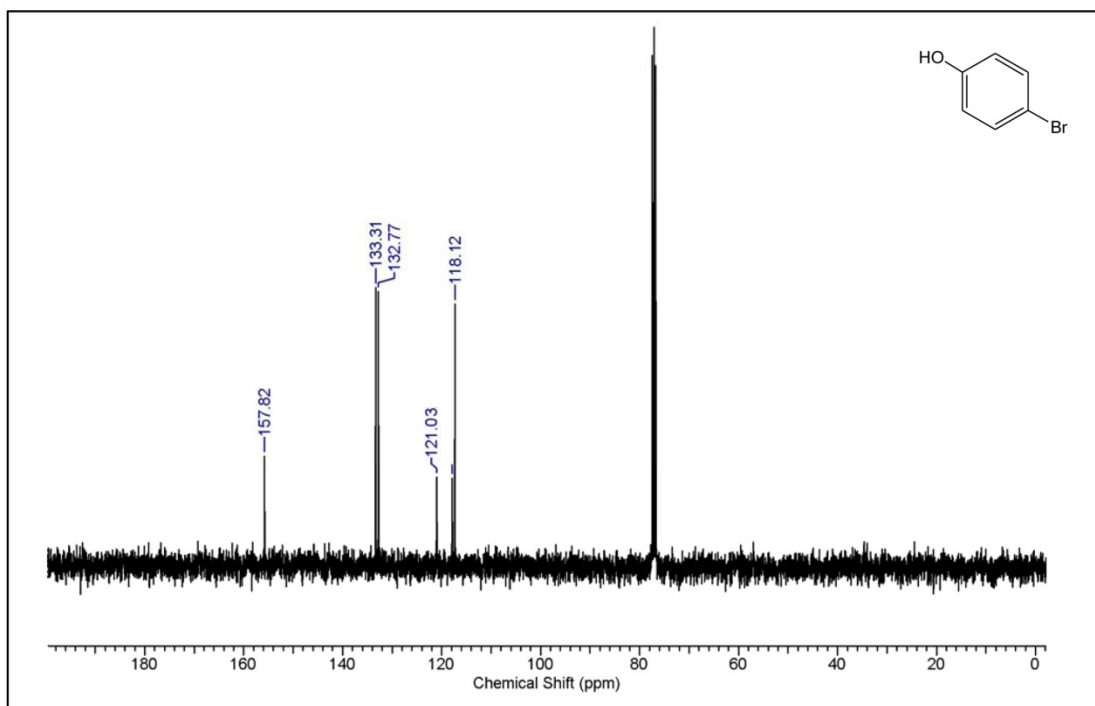

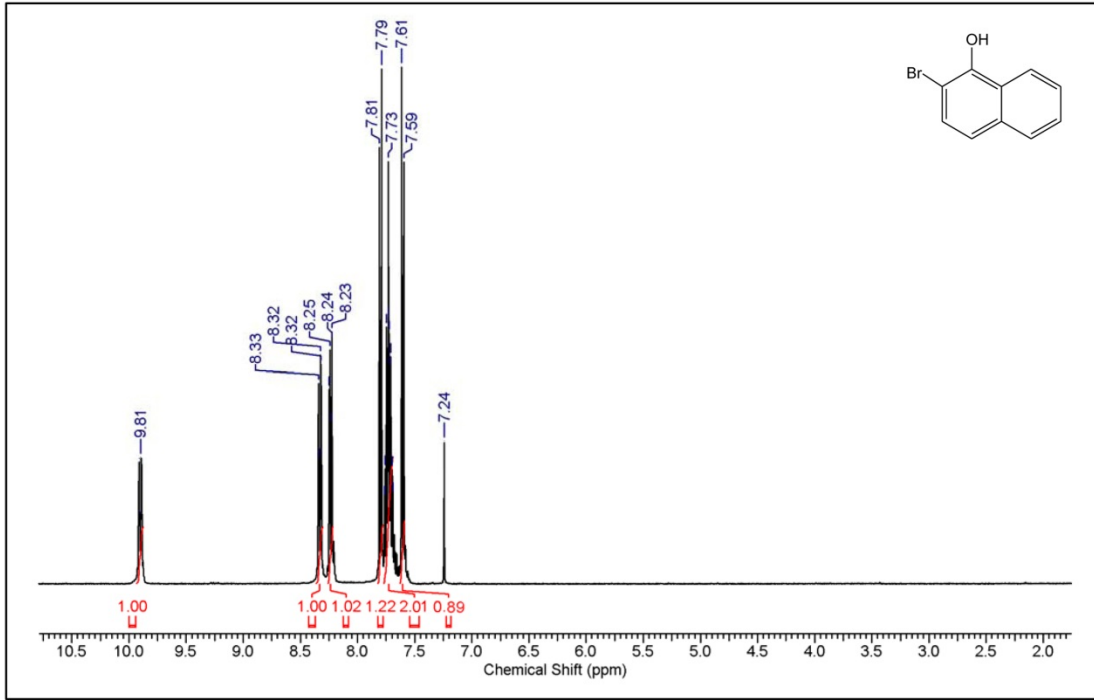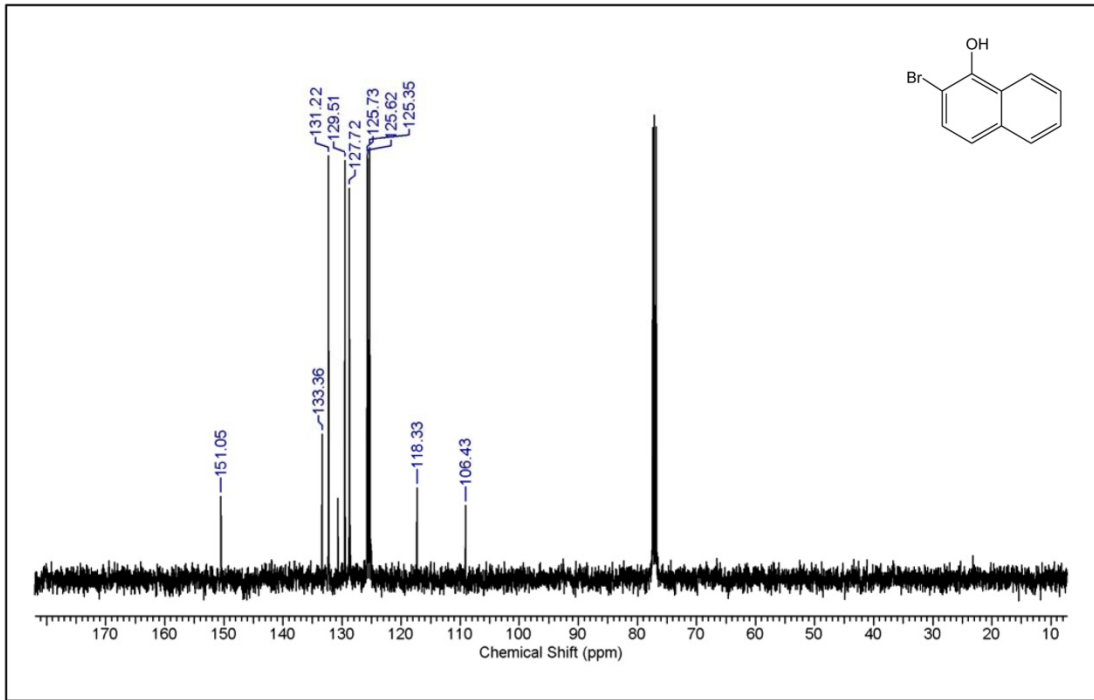

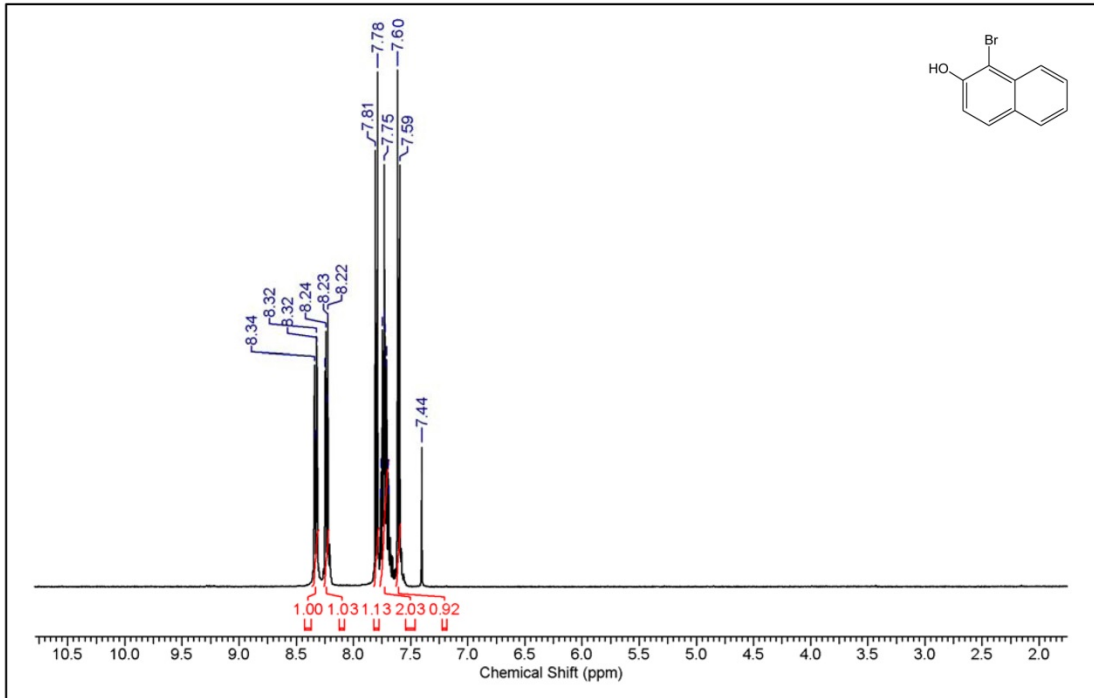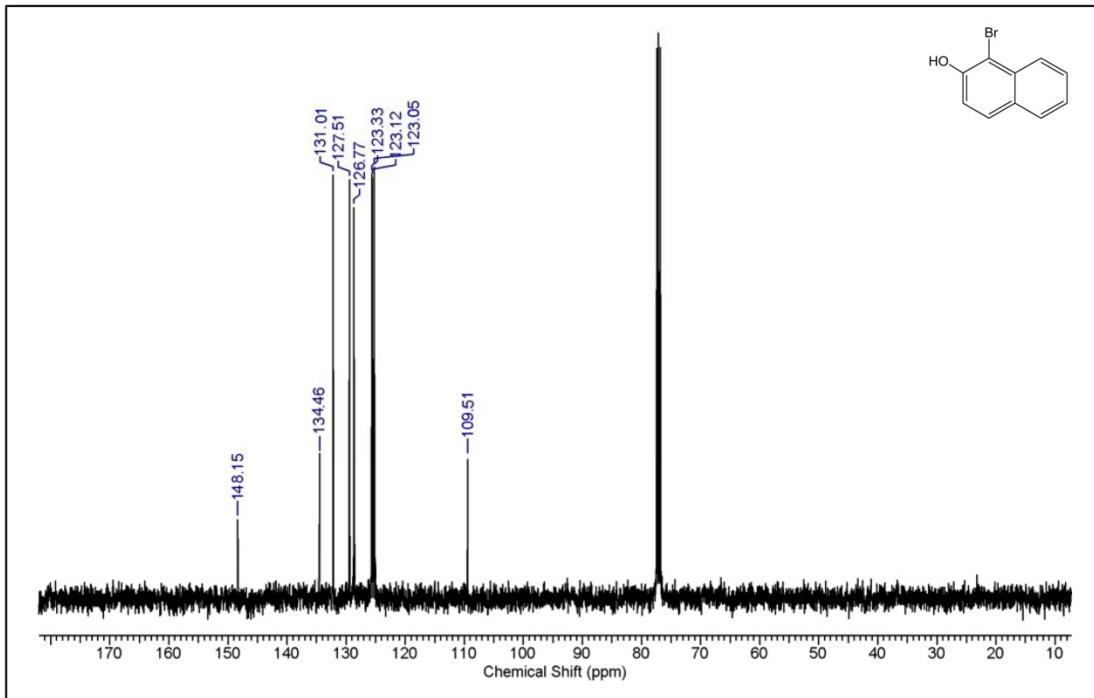

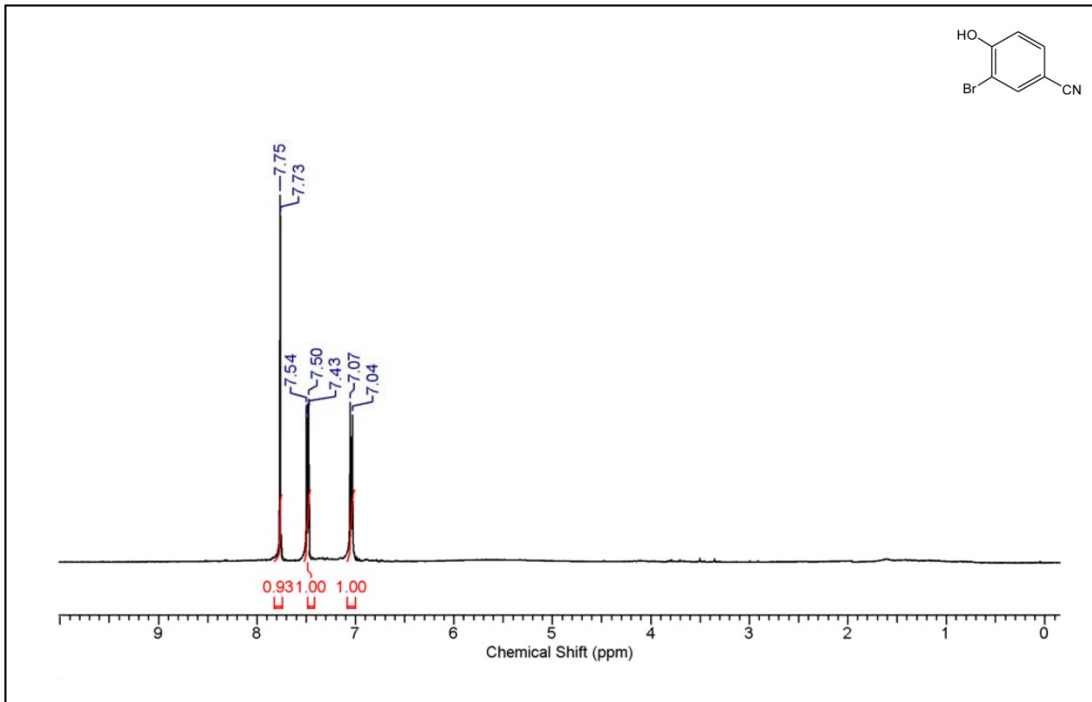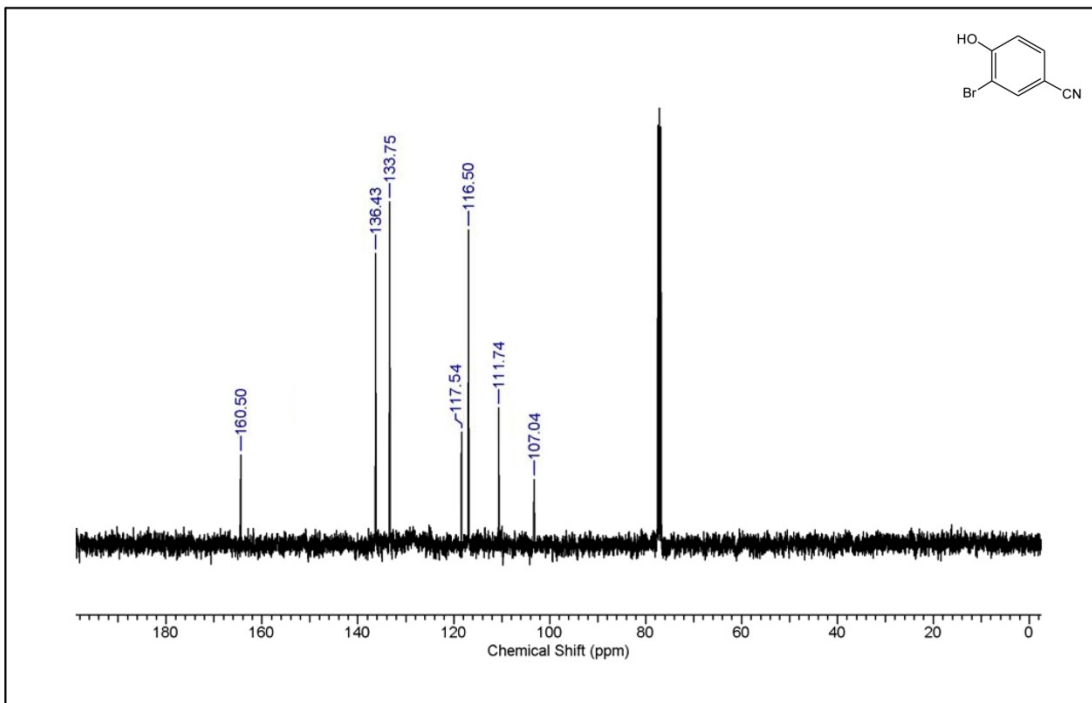

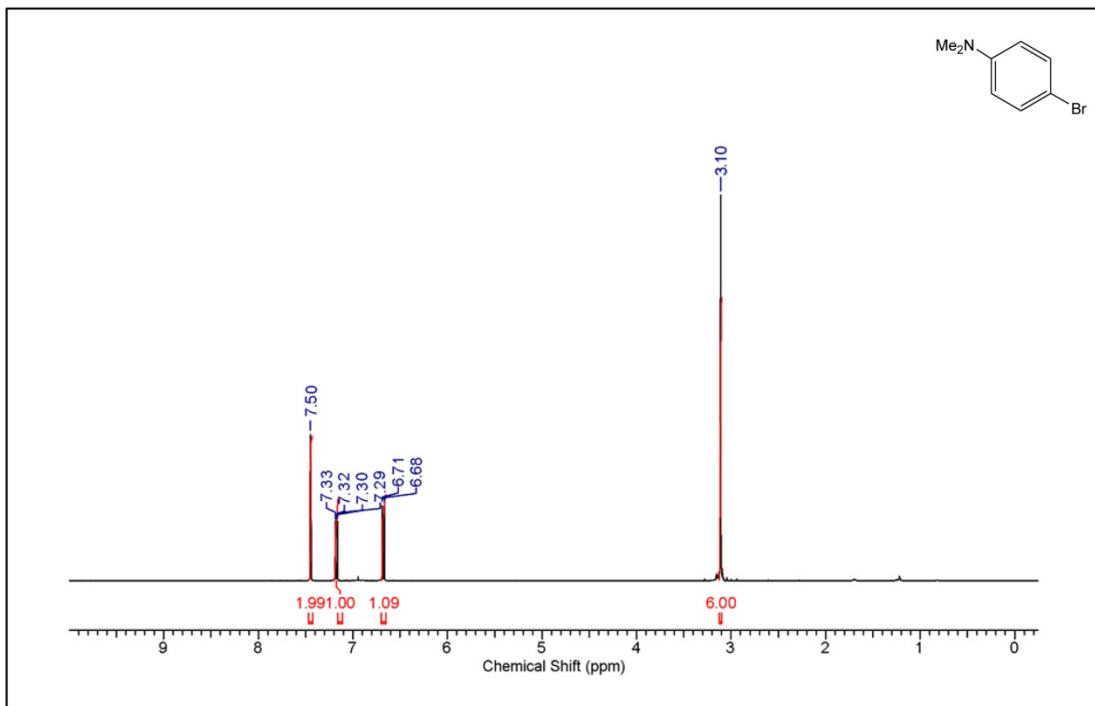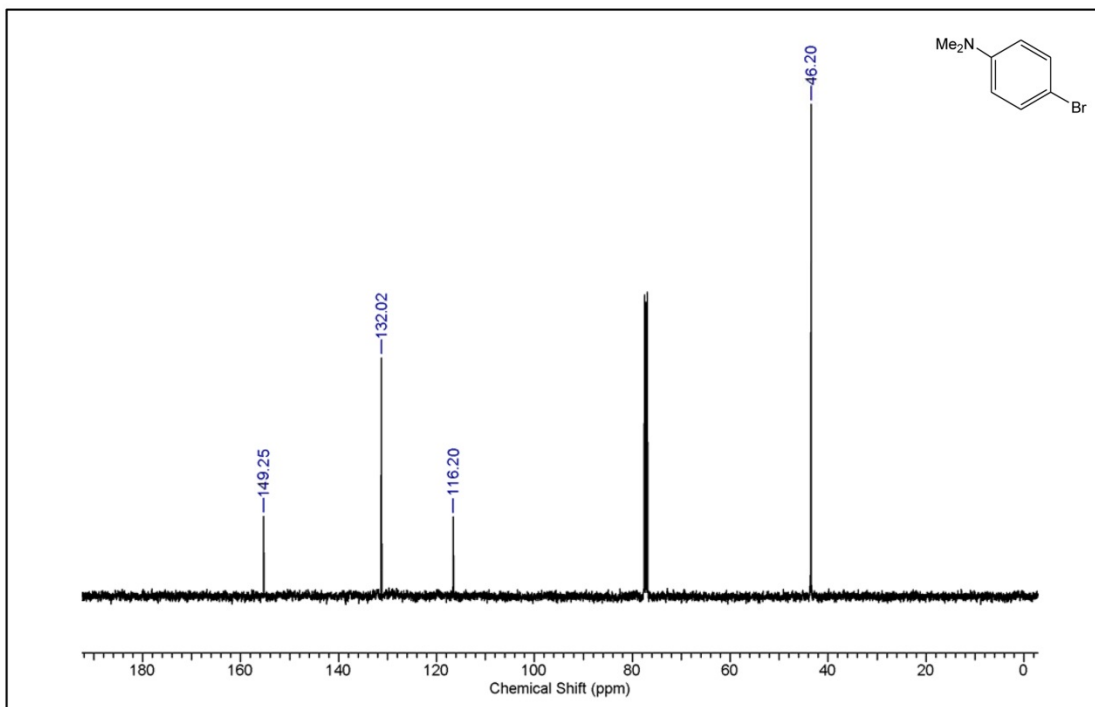

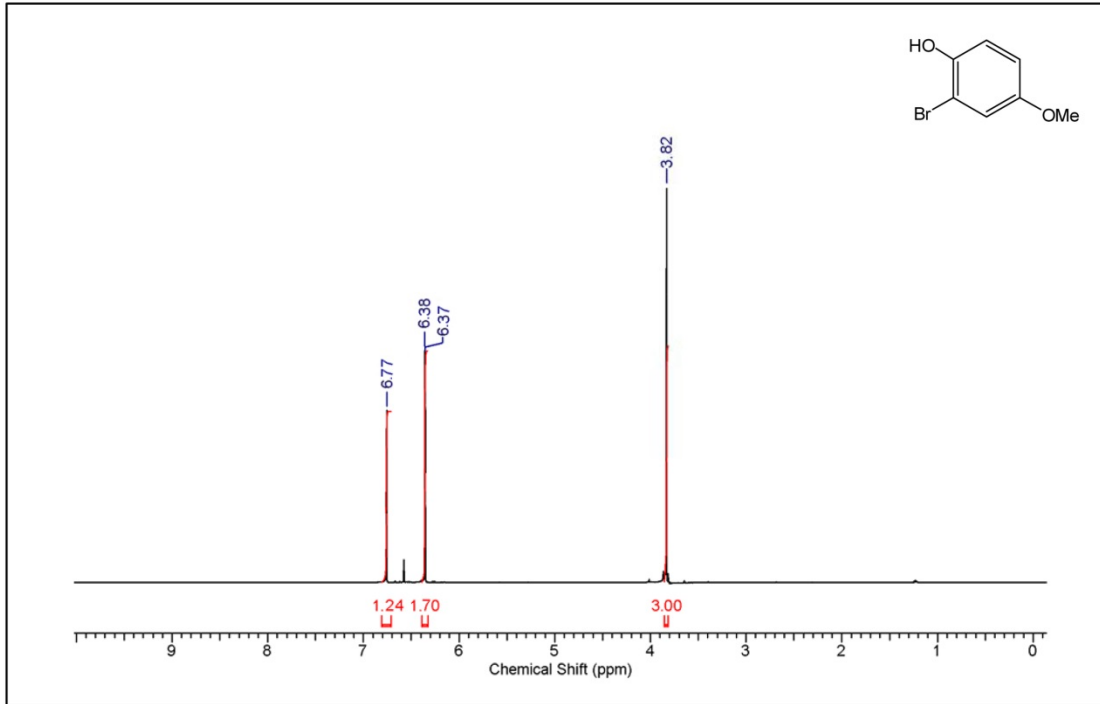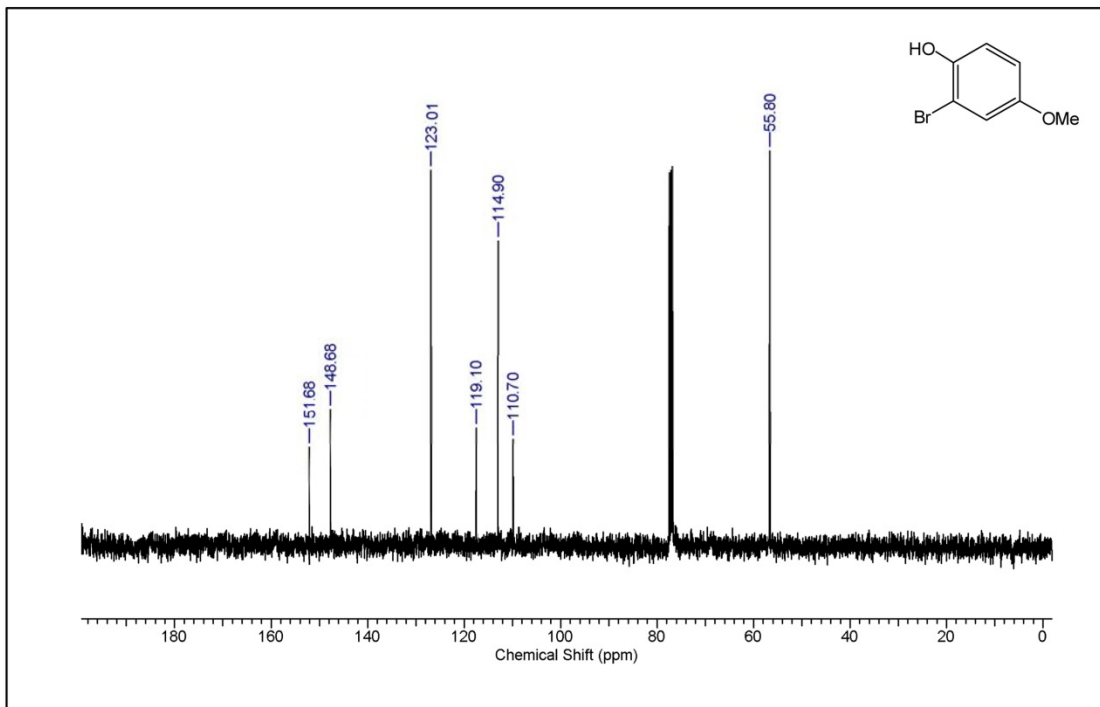

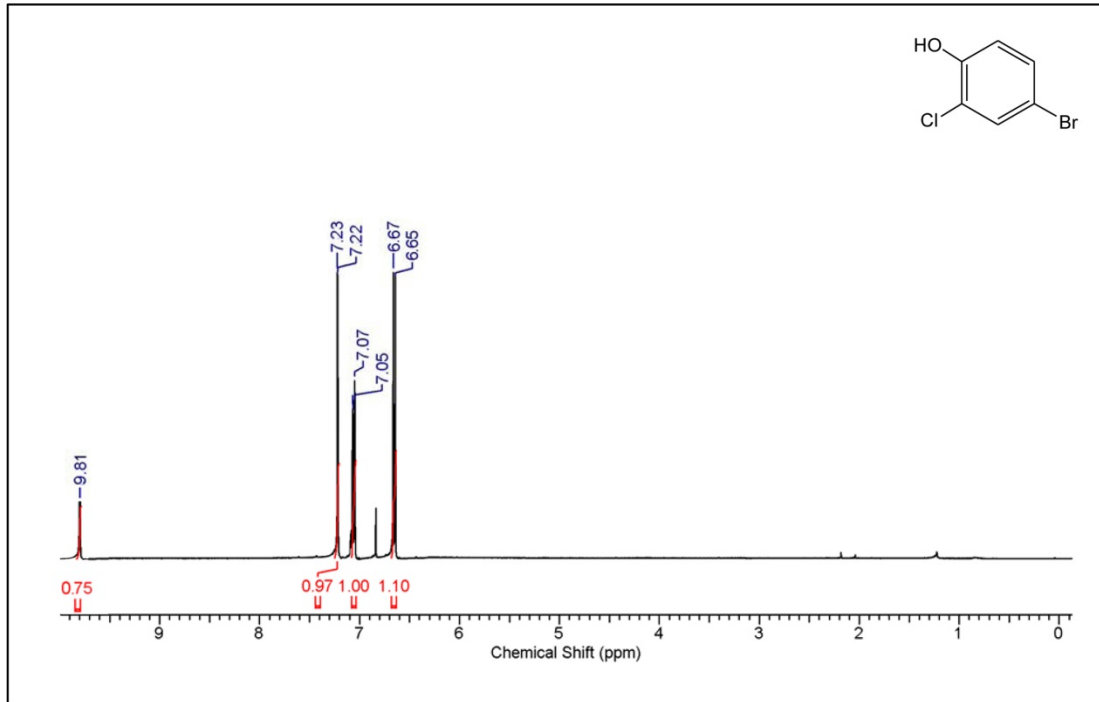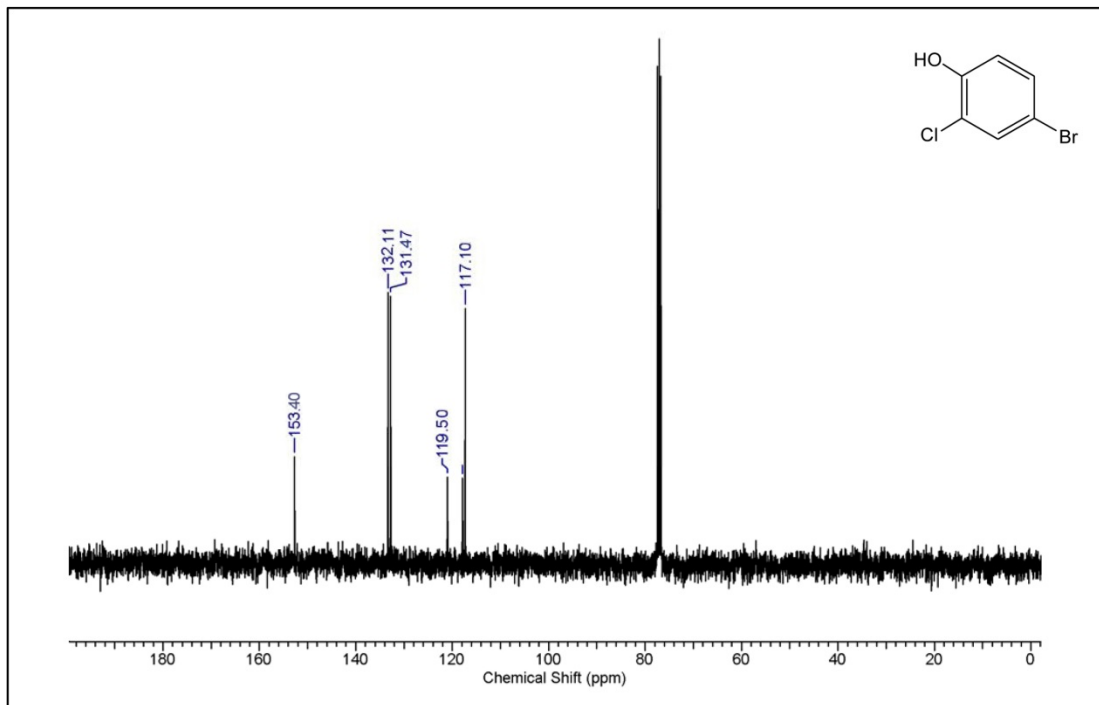

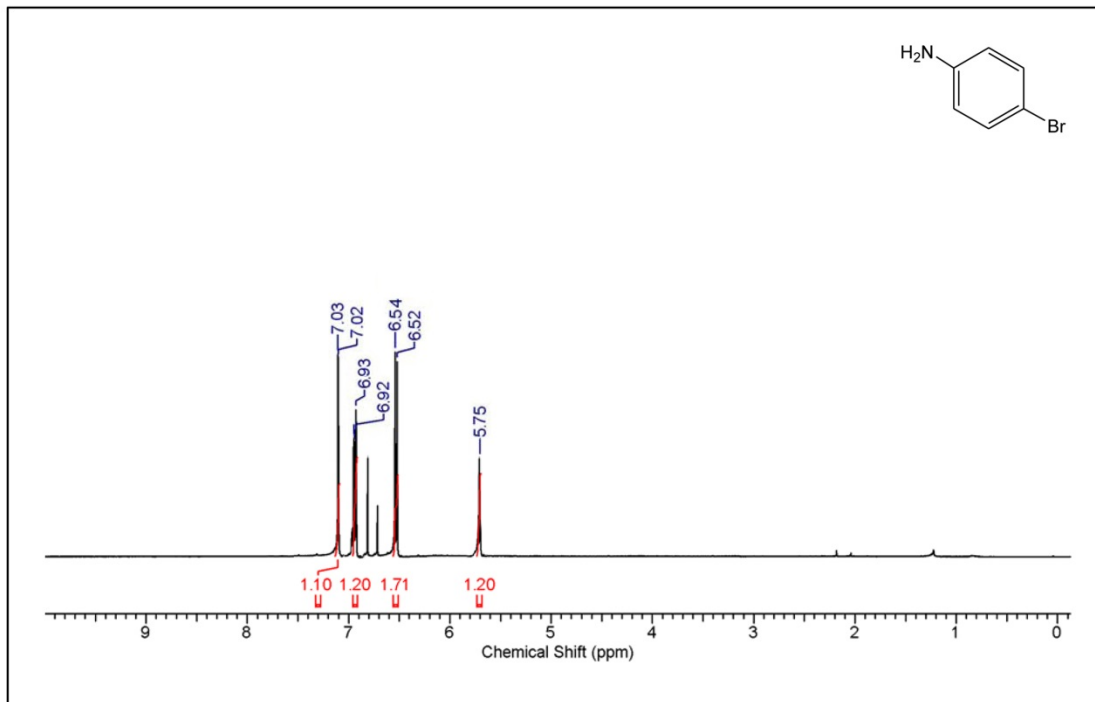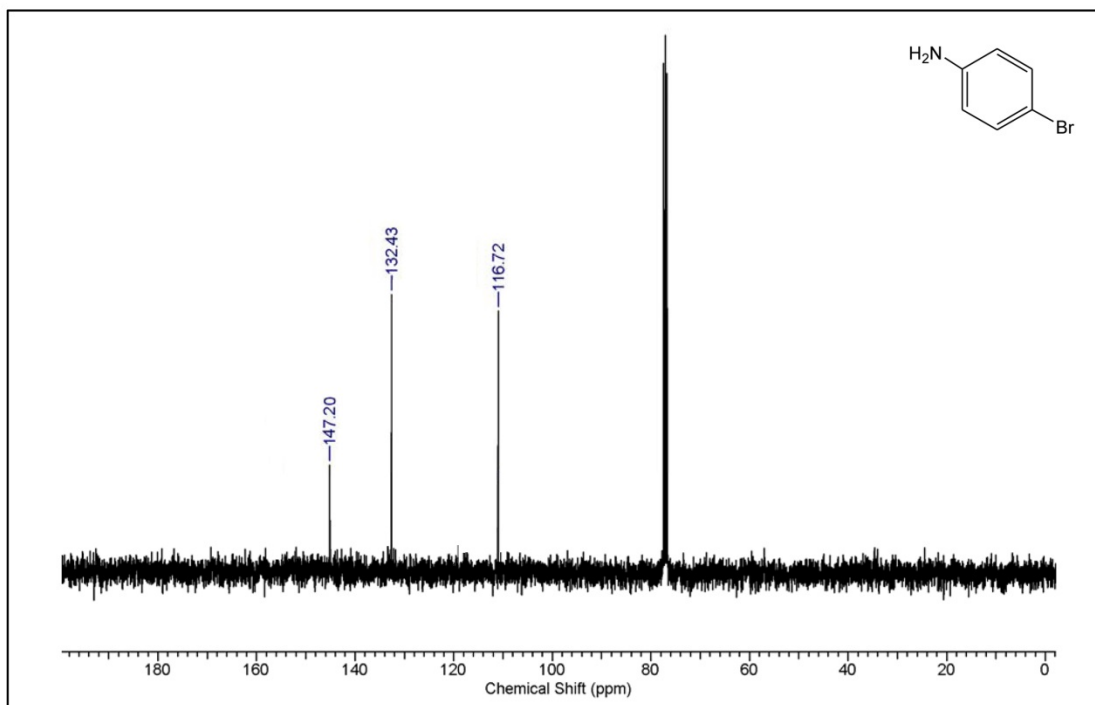



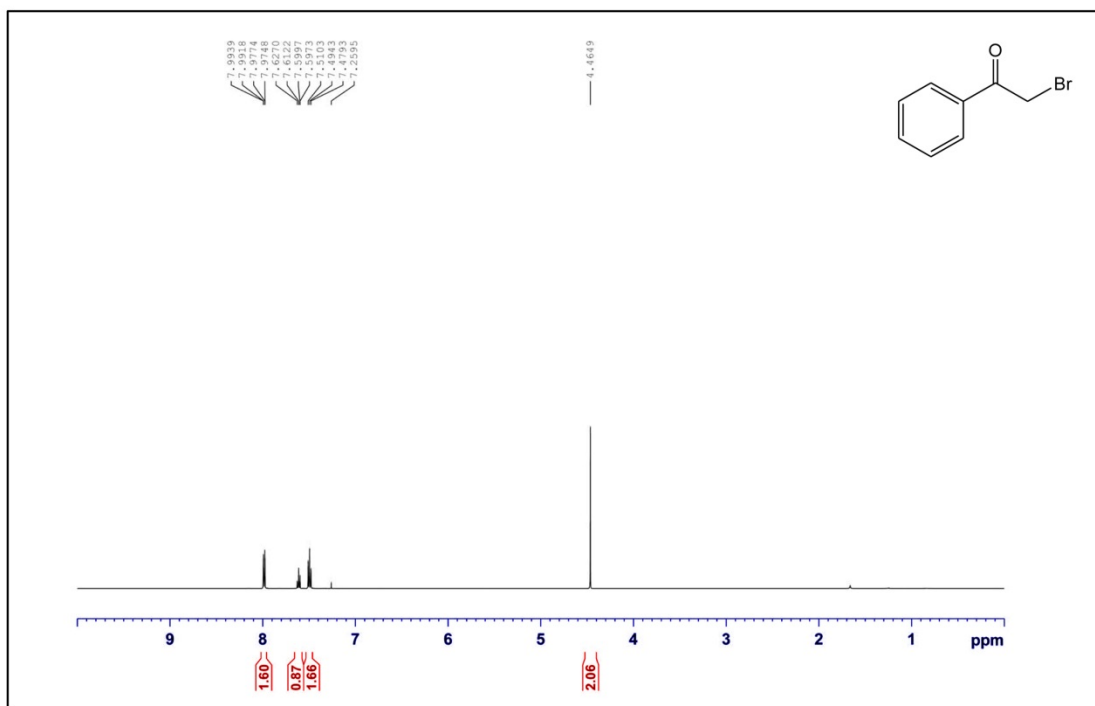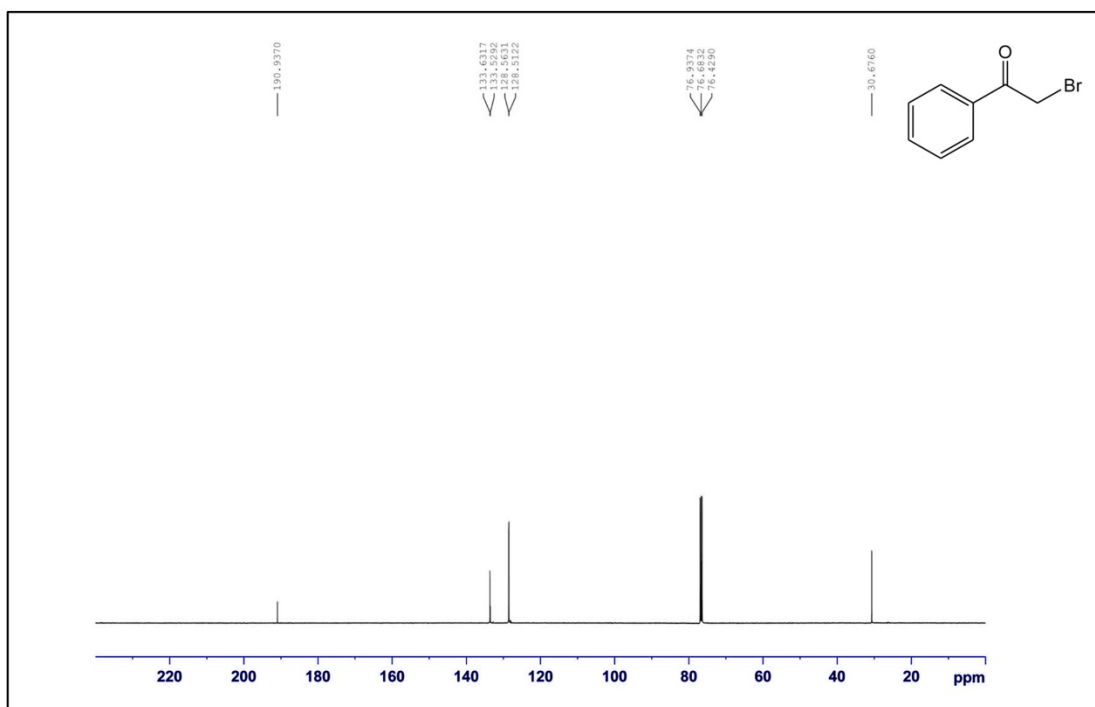

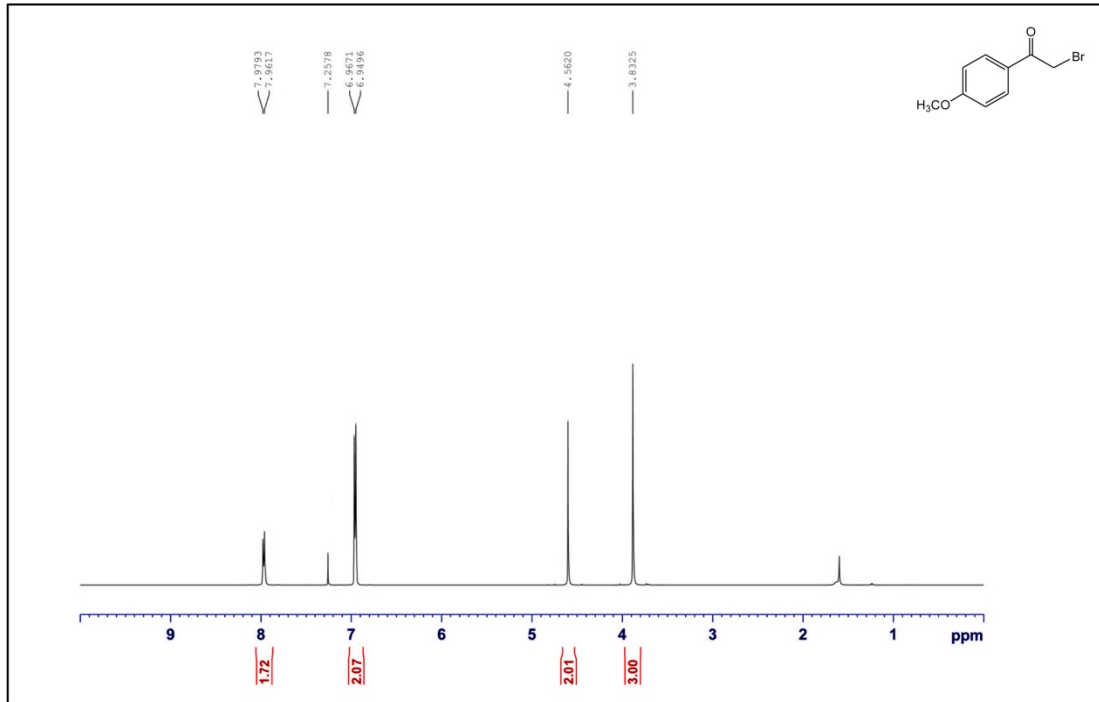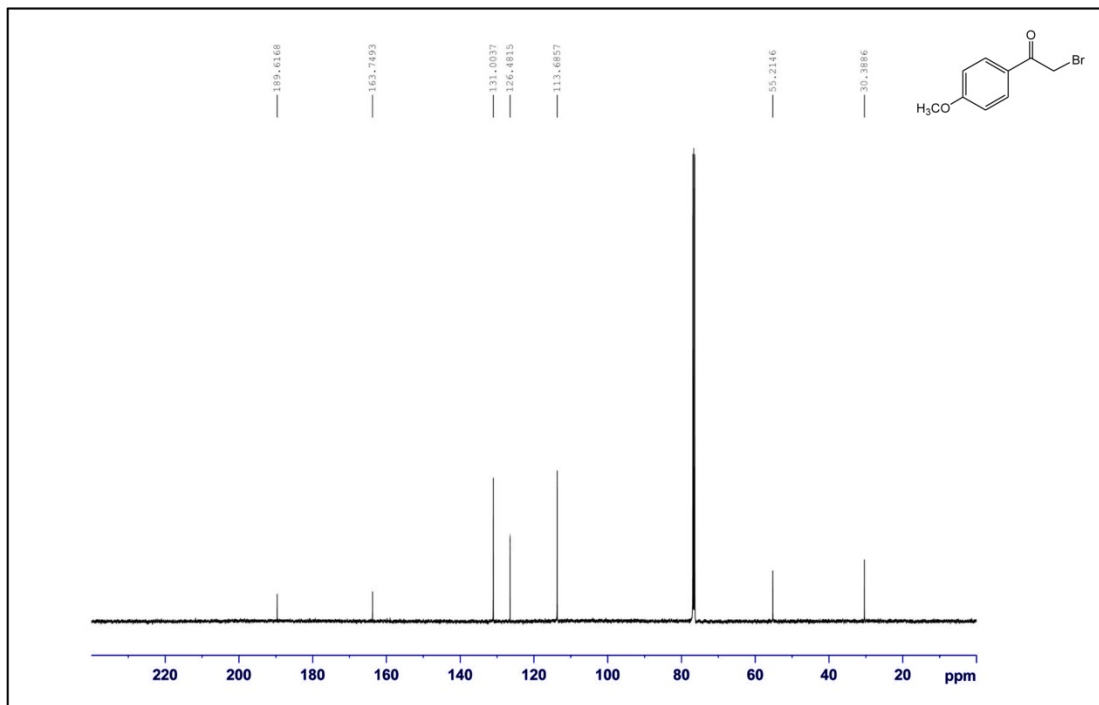

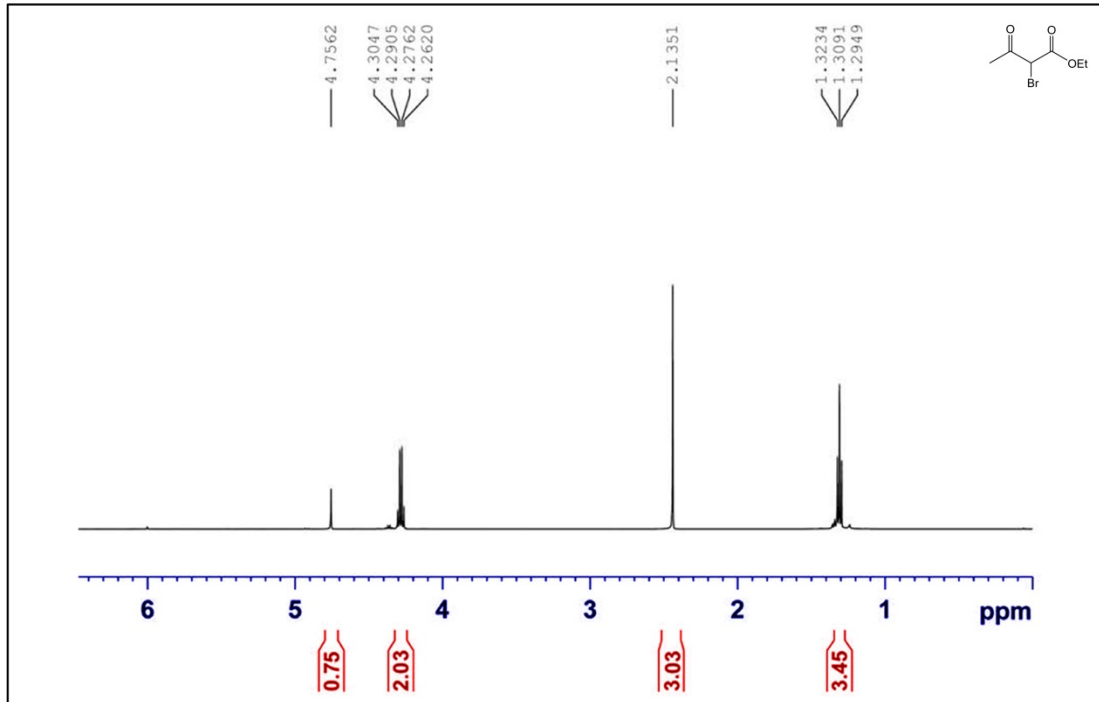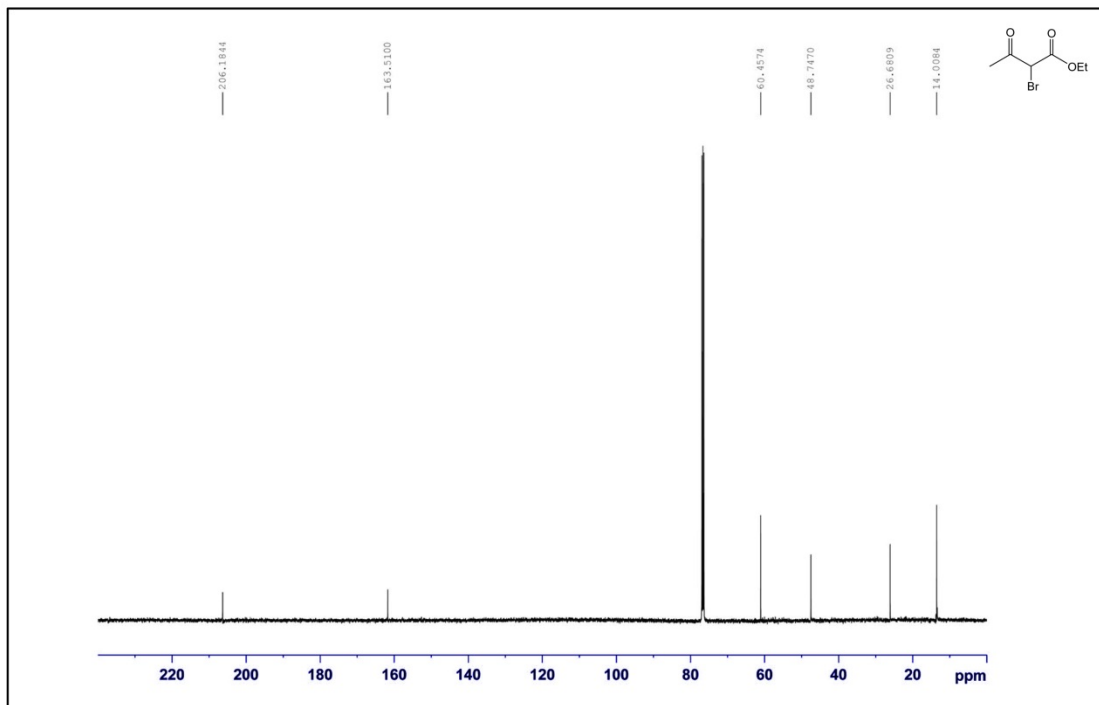

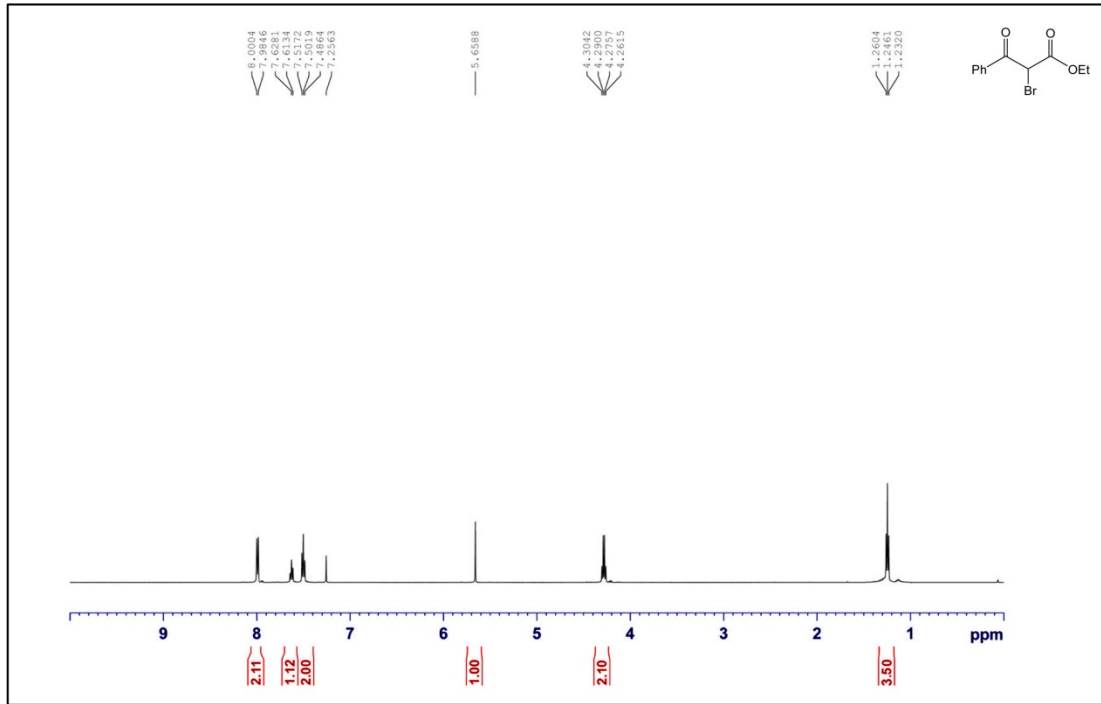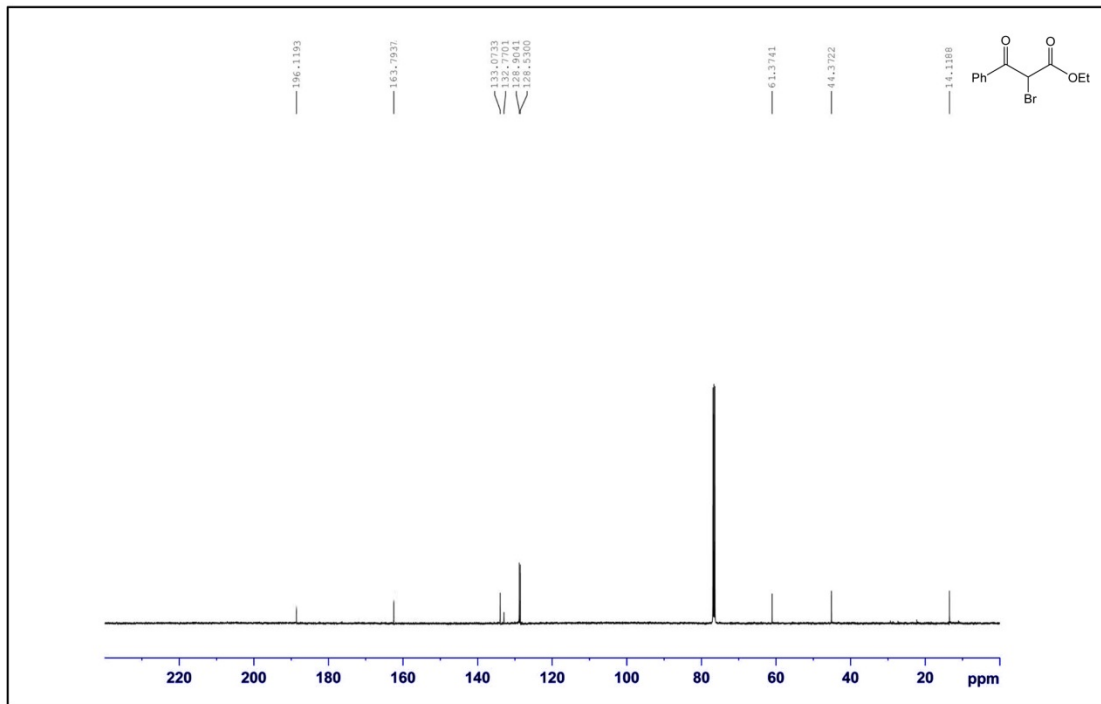

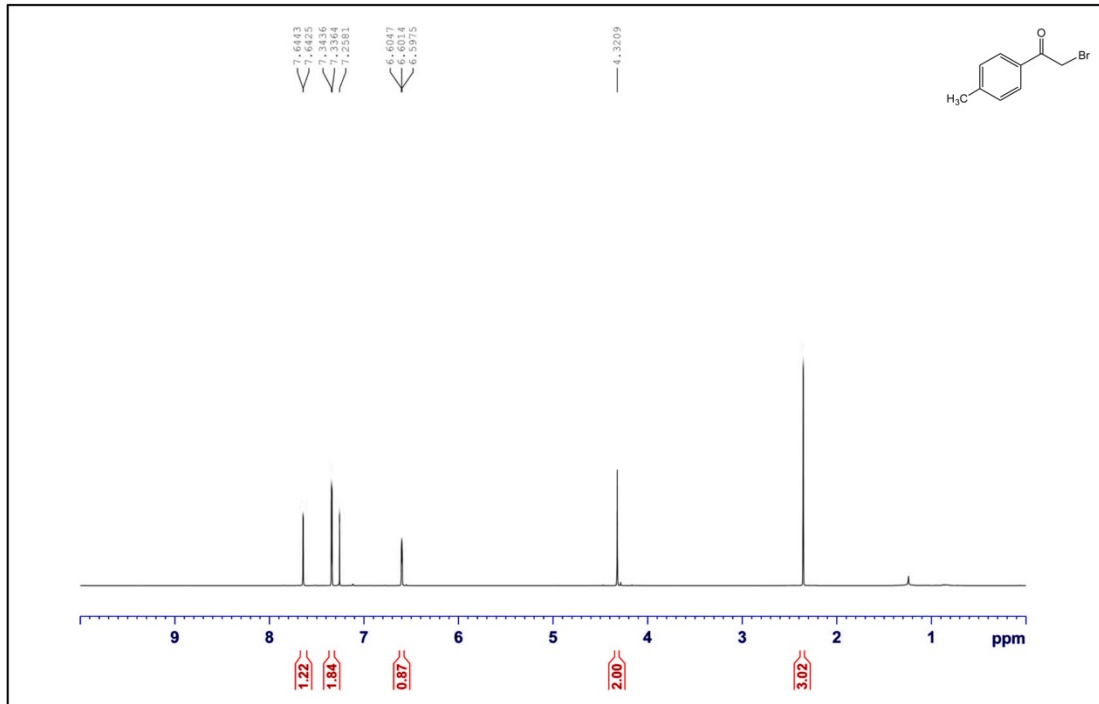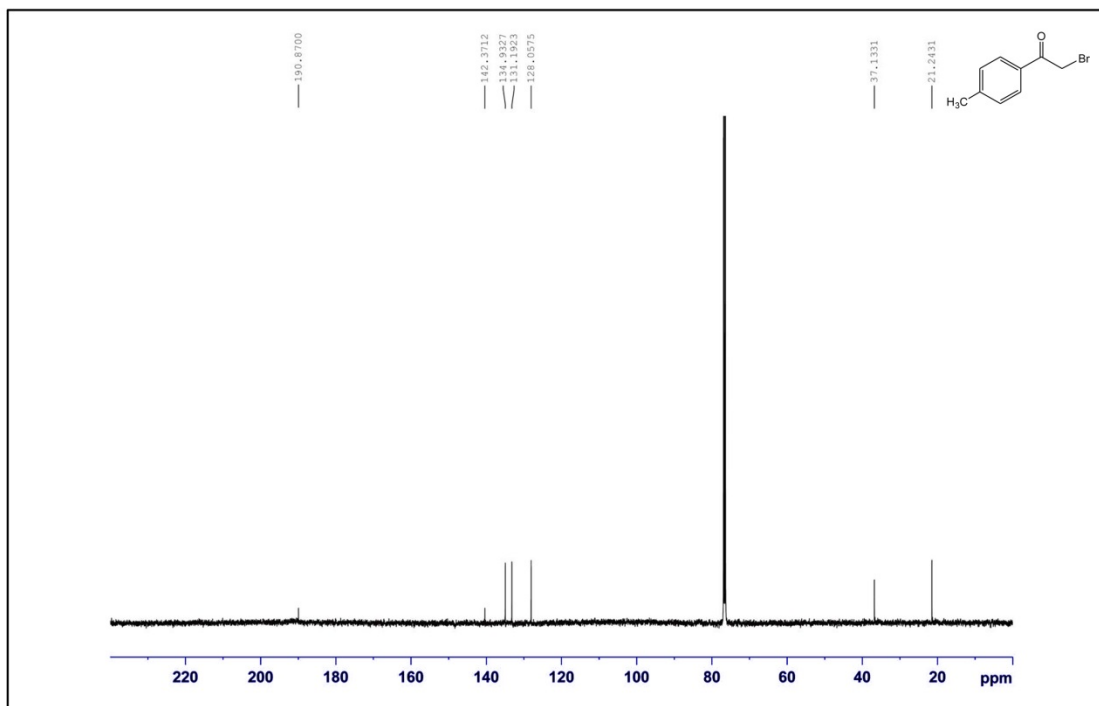

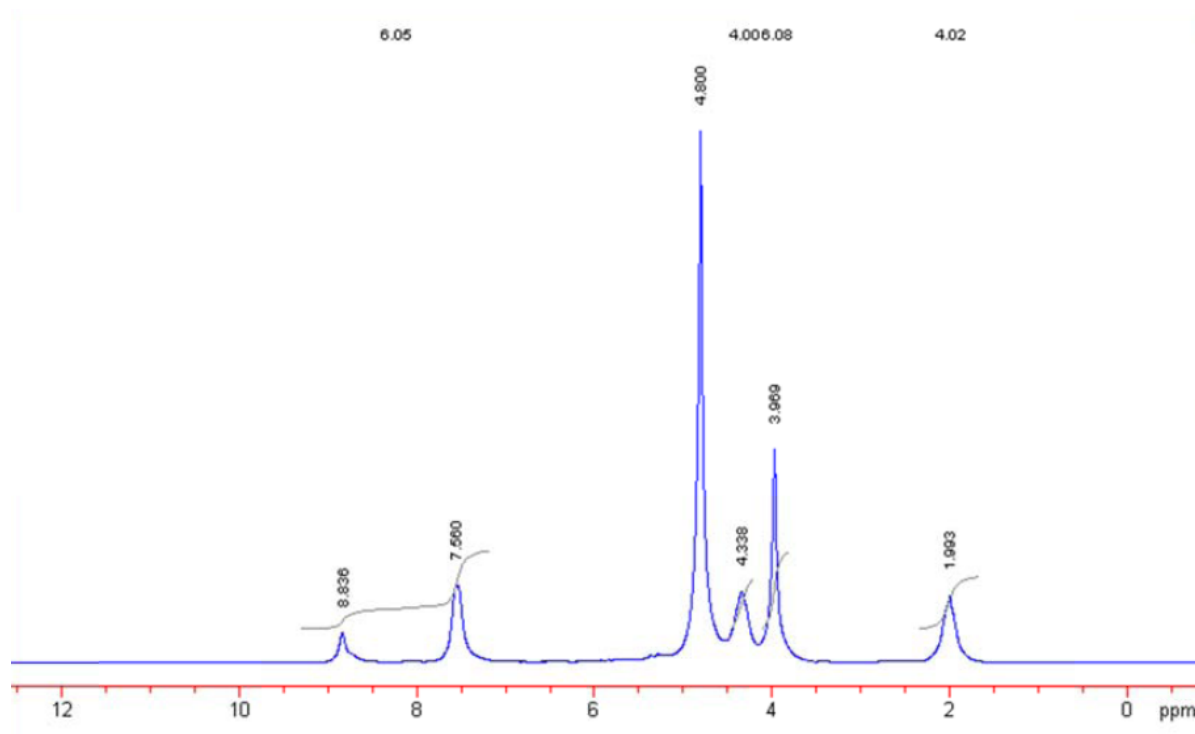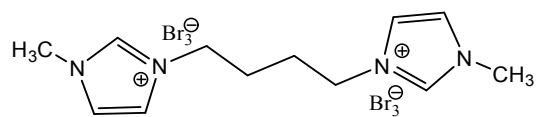

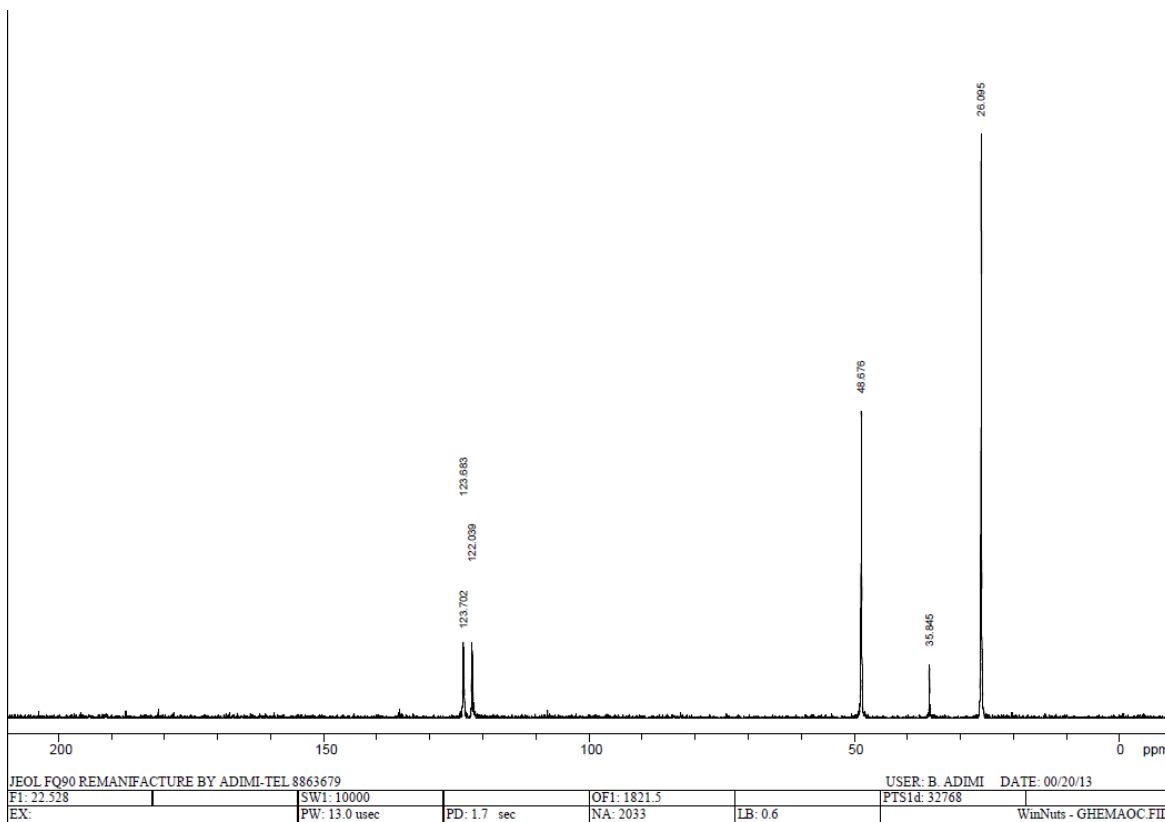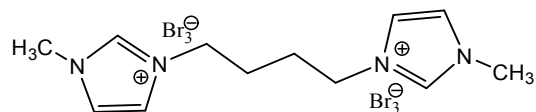

Supplement: c4ra03006k1.pdf [file c4ra03006k1.pdf]
